# Supplementary material
Source: Springer Nature journal article supplement (https://www.springermedizin.de/resource/supplementary/12936_2011_1946_MOESM24_ESM.pdf/9542110)

17

Conservarse a menos de 30°C  
Los medicamentos deben conservarse fuera  
del alcance de los niños  
Conserver au-dessous de 30°C  
Les médicaments doivent être tenus hors  
de la portée des enfants

NAFDAC Reg. No. 04-3275

114  
417  
801

artemether, 20 mg,  
lumefantrín, 120 mg,  
excip. pro compr.

**Coartem® 20/120**

artemether.  
lumefantrín.

**NOVARTIS**

Antimalarial agent  
Antimalariamittel

24 Tabl. 20/120 mg

Coartem® 20/120  
24 Tabl./compr. 20/120 mg

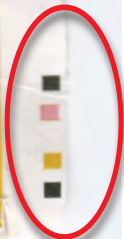

**Coartem® 20/120**  
24 Tabl./compr. 20/120 mg

Store below 30°C  
Medicines should be kept out of the reach  
of children

Unter 30°C lagern  
Arzneimittel sollen für Kinder unerreichbar  
aufbewahrt werden

Manufactured by  
Beijing Novartis Pharma Ltd, Beijing, China  
for Novartis Pharma AG, Basle, Switzerland,  
under license from the PRC

76832  
dfes

**Coartem® 20/120**

artemether.  
lumefantrín.

**NOVARTIS**

Antipalúdico  
Antipaludique

24 compr. 20/120 mg

Coartem® 20/120  
EXP  
MFD  
LOT

07/00011

010

010

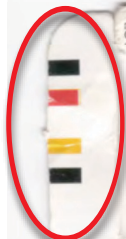

Supplement: MOESM24 [file 9542110]
